# Supplementary material for: Obstetric and Perinatal Outcomes of Singleton Births Following Single- vs Double-Embryo Transfer in Sweden
Source: PubMed Central journal article supplement (PMC9857532; doi:10.1001/jamapediatrics.2022.4787), 2022-12-05
Supplement: jamapediatr-e224787-s001.pdf [file jamapediatr-e224787-s001.pdf]

## Supplemental Online Content

Rodriguez-Wallberg KA, Palomares AR, Nilsson HP, et al. Obstetric and perinatal outcomes of singleton births following single- vs double-embryo transfer in Sweden. *JAMA Pediatr*. Published online December 5, 2022.  
doi:10.1001/jamapediatrics.2022.4787

**eTable 1.** *International Classification of Diseases, Tenth Revision* Codes for Major and Minor Malformations

**eTable 2.** Pregnancy and Birth Outcomes in Double-Embryo Transfer (DET) or Single-Embryo Transfer (SET) vs Spontaneous Pregnancies

**eTable 3.** Pregnancy and Birth Outcomes in Double-Embryo Transfer (DET) vs Single-Embryo Transfer (SET) Pregnancies Among Frozen Cycles Only

**eTable 4.** Pregnancy Outcomes in Double-Embryo Transfer (DET) vs Single-Embryo Transfer (SET) Pregnancies Stratified by Fresh or Frozen Cycle and by Cleavage Stage or Blastocyst Transfer

**eTable 5.** Pregnancy and Birth Outcomes in Double-Embryo Transfer (DET) vs Single-Embryo Transfer (SET) Pregnancies Among First Births Only

**eTable 6.** Sensitivity Analysis of Table 2, Including Adjustments by Means of Multiple Imputation

This supplemental material has been provided by the authors to give readers additional information about their work.

**eTable 1. International Classification of Diseases, Tenth Revision Codes for Major and Minor Malformations**

| Organ System                                                                           | Major malformations                                                                              | Minor malformations                                         |
|----------------------------------------------------------------------------------------|--------------------------------------------------------------------------------------------------|-------------------------------------------------------------|
| Nervous System                                                                         | Q00-Q07                                                                                          | -                                                           |
| Eye                                                                                    | Q100, Q104, Q106-Q109, Q11-Q12, Q130-Q134, Q136-Q139, Q14-Q15                                    | Q101-Q103, Q105, Q135                                       |
| Ear, Face and Neck                                                                     | Q16, Q176-Q178, Q183, Q188                                                                       | Q170-Q175, Q179, Q180-Q182, Q184-Q187, Q189                 |
| Congenital Heart Defects                                                               | Q20-Q23, Q240-Q245, Q247-Q249, Q25, Q260, Q262-Q269                                              | Q250 and Q256 if GA <37w, Q246, Q261                        |
| Respiratory System                                                                     | Q30, Q310-Q313, Q315-Q319, Q321, Q323-Q329, Q330, Q332-Q339, Q34                                 | Q314, Q320, Q322, Q331                                      |
| Orofacial Clefts                                                                       | Q35-Q37                                                                                          | -                                                           |
| Digestive System                                                                       | Q380, Q383-Q389, Q39, Q402-Q409, Q41-Q42, Q431-Q439, Q440-Q443, Q445-Q449, Q45, Q790             | Q381-Q382, Q385A, Q400-Q401, Q430, Q444                     |
| Abdominal Wall Defects                                                                 | Q792-Q793, Q795                                                                                  | -                                                           |
| Urinary System                                                                         | Q60, Q611-Q619, Q620-Q626, Q628-Q629, Q630-Q632, Q634-Q639, Q64, Q794                            | Q610, Q627, Q633                                            |
| Genital Organs                                                                         | Q500, Q503-Q504, Q506-Q509, Q51, Q520-Q522, Q524, Q526, Q528-Q529, Q540-Q543, Q545-Q549, Q55-Q56 | Q501-Q502, Q505, Q523, Q525, Q527, Q53, Q544                |
| Limb                                                                                   | Q650-Q652, Q657, Q660, Q679, Q681-Q682, Q686-Q689, Q70-Q74                                       | Q653-Q656, Q658-Q659, Q661-Q669, Q670-Q678, Q680, Q683-Q685 |
| Other musculoskeletal                                                                  | Q750-Q751, Q754-Q759, Q761-Q764, Q766-Q769, Q77, Q78, Q791, Q792-Q793, Q795-Q799                 | Q752-Q753, Q760, Q765, Q791, Q794                           |
| Other                                                                                  | Q271-Q279, Q28, Q80-Q81, Q820-Q824, Q826-Q829, Q83-Q85, Q860, Q890, Q893-Q898                    | Q270, Q825, Q891-Q892, Q899                                 |
| Teratogenic/genetic syndromes, microdeletions and chromosomal abnormalities (excluded) | Q861-Q869, Q87, Q90-Q99, P350-P352, P371, D821                                                   | -                                                           |

Definitions based on the European network of population-based registries for the epidemiological surveillance of congenital anomalies (EUROCAT) guide 1.4 version 23.09.2020

([https://eu-rd-platform.jrc.ec.europa.eu/eurocat/data-collection/guidelines-for-data-registration\\_en](https://eu-rd-platform.jrc.ec.europa.eu/eurocat/data-collection/guidelines-for-data-registration_en))

**eTable 2.** Pregnancy and Birth Outcomes in Double-Embryo Transfer (DET) or Single-Embryo Transfer (SET) vs Spontaneous Pregnancies

|                                           | AAR, %<br>(95% CI)  |                     | ARD, percentage points<br>(95% CI) |                    |                    | RRR or OR<br>(95% CI) <sup>a</sup> |                     |
|-------------------------------------------|---------------------|---------------------|------------------------------------|--------------------|--------------------|------------------------------------|---------------------|
|                                           | DET                 | SET                 | Spont.                             | DET vs<br>spont.   | SET vs<br>spont.   | DET vs<br>spont.                   | SET vs<br>spont.    |
| Gestational hypertension (yes vs no)      | 3.9 (3.5 to 4.4)    | 4.1 (3.9 to 4.3)    | 4.1 (4.1 to 4.1)                   | -0.2 (-0.6 to 0.3) | 0.0 (-0.2 to 0.2)  | 0.95 (0.85 to 1.07)                | 1.01 (0.96 to 1.06) |
| Preeclampsia (yes vs no)                  | 2.7 (2.3 to 3.0)    | 2.9 (2.7 to 3.0)    | 2.8 (2.7 to 2.8)                   | -0.1 (-0.5 to 0.3) | 0.1 (-0.1 to 0.3)  | 0.96 (0.83 to 1.10)                | 1.04 (0.98 to 1.10) |
| Gestational diabetes (yes vs no)          | 1.8 (1.5 to 2.1)    | 1.9 (1.8 to 2.1)    | 1.8 (1.8 to 1.9)                   | -0.1 (-0.4 to 0.3) | 0.1 (-0.1 to 0.2)  | 0.97 (0.80 to 1.16)                | 1.04 (0.96 to 1.13) |
| Bleeding during pregnancy (yes vs no)     | 3.7 (3.3 to 4.1)    | 3.4 (3.2 to 3.6)    | 2.0 (2.0 to 2.1)                   | 1.6 (1.2 to 2.0)   | 1.4 (1.2 to 1.6)   | 1.83 (1.63 to 2.06)                | 1.70 (1.60 to 1.80) |
| Placental abruption (yes vs no)           | 0.6 (0.4 to 0.8)    | 0.6 (0.5 to 0.7)    | 0.3 (0.3 to 0.3)                   | 0.3 (0.1 to 0.5)   | 0.3 (0.2 to 0.3)   | 1.83 (1.29 to 2.59)                | 1.82 (1.56 to 2.12) |
| Prelabor rupture of membranes (yes vs no) | 1.8 (1.5 to 2.1)    | 2.0 (1.8 to 2.1)    | 1.6 (1.6 to 1.6)                   | 0.2 (-0.1 to 0.6)  | 0.4 (0.2 to 0.5)   | 1.15 (0.96 to 1.38)                | 1.25 (1.16 to 1.35) |
| Mode of delivery (vs unassisted vaginal)  |                     |                     |                                    |                    |                    |                                    |                     |
| Instrumental vaginal                      | 7.6 (6.9 to 8.2)    | 7.6 (7.3 to 7.8)    | 7.9 (7.8 to 7.9)                   | -0.3 (-1.0 to 0.3) | -0.3 (-0.6 to 0.0) | 0.95 (0.86 to 1.05)                | 0.95 (0.91 to 0.99) |
| Planned cesarean                          | 12.1 (11.2 to 13.0) | 11.3 (10.9 to 11.7) | 8.5 (8.5 to 8.6)                   | 3.6 (2.7 to 4.4)   | 2.8 (2.4 to 3.2)   | 1.49 (1.36 to 1.62)                | 1.38 (1.33 to 1.43) |
| Emergency cesarean                        | 12.5 (11.6 to 13.3) | 12.2 (11.8 to 12.5) | 10.9 (10.8 to 11.0)                | 1.5 (0.7 to 2.4)   | 1.3 (0.9 to 1.6)   | 1.17 (1.08 to 1.26)                | 1.14 (1.10 to 1.18) |
| Induced delivery (yes vs no)              | 17.3 (16.3 to 18.3) | 16.7 (16.3 to 17.1) | 14.3 (14.2 to 14.4)                | 3.0 (2.0 to 4.0)   | 2.4 (2.0 to 2.8)   | 1.25 (1.17 to 1.34)                | 1.20 (1.16 to 1.24) |
| Infant death within 0-27 days (yes vs no) | 0.2 (0.1 to 0.4)    | 0.1 (0.1 to 0.2)    | 0.1 (0.1 to 0.1)                   | 0.1 (0.0 to 0.3)   | 0.0 (0.0 to 0.0)   | 2.02 (1.16 to 3.53)                | 1.01 (0.72 to 1.42) |
| Gestational age (vs term)                 |                     |                     |                                    |                    |                    |                                    |                     |
| Moderately preterm (32-36 weeks)          | 4.5 (4.0 to 5.0)    | 5.3 (5.0 to 5.5)    | 3.9 (3.9 to 4.0)                   | 0.6 (0.0 to 1.1)   | 1.3 (1.1 to 1.6)   | 1.15 (1.02 to 1.31)                | 1.36 (1.30 to 1.43) |
| Very preterm (<32 weeks)                  | 1.1 (0.9 to 1.4)    | 1.1 (0.9 to 1.2)    | 0.7 (0.6 to 0.7)                   | 0.5 (0.2 to 0.7)   | 0.4 (0.3 to 0.5)   | 1.72 (1.36 to 2.18)                | 1.59 (1.43 to 1.78) |
| Low birth weight (<2500g vs ≥2500g)       | 3.8 (3.3 to 4.2)    | 4.1 (3.9 to 4.3)    | 3.0 (3.0 to 3.0)                   | 0.8 (0.3 to 1.2)   | 1.1 (0.9 to 1.3)   | 1.27 (1.12 to 1.44)                | 1.38 (1.30 to 1.46) |
| BWGA percentile (vs 25.0-74.9 percentile) |                     |                     |                                    |                    |                    |                                    |                     |
| <10.0                                     | 18.8 (17.6 to 20.1) | 18.7 (18.2 to 19.3) | 17.8 (17.7 to 17.8)                | 1.1 (-0.2 to 2.4)  | 1.0 (0.4 to 1.5)   | 1.08 (0.99 to 1.18)                | 1.07 (1.03 to 1.11) |
| 10.0-24.9                                 | 25.3 (23.9 to 26.7) | 24.5 (23.9 to 25.1) | 24.4 (24.3 to 24.5)                | 0.9 (-0.5 to 2.3)  | 0.1 (-0.5 to 0.7)  | 1.05 (0.97 to 1.13)                | 1.00 (0.97 to 1.04) |
| 75.0-89.9                                 | 19.3 (17.9 to 20.8) | 21.1 (20.5 to 21.7) | 20.2 (20.2 to 20.3)                | -0.9 (-2.3 to 0.5) | 0.8 (0.2 to 1.4)   | 0.94 (0.86 to 1.03)                | 1.05 (1.01 to 1.09) |
| ≥90.0                                     | 13.3 (12.0 to 14.6) | 15.7 (15.1 to 16.2) | 14.3 (14.2 to 14.3)                | -1.0 (-2.3 to 0.3) | 1.4 (0.8 to 2.0)   | 0.92 (0.82 to 1.03)                | 1.12 (1.07 to 1.17) |
| Apgar score (<7 vs ≥7)                    | 1.2 (0.9 to 1.4)    | 1.3 (1.2 to 1.4)    | 1.2 (1.2 to 1.2)                   | 0.0 (-0.3 to 0.2)  | 0.1 (0.0 to 0.2)   | 0.97 (0.77 to 1.22)                | 1.07 (0.98 to 1.18) |
| Congenital malformation (vs none)         |                     |                     |                                    |                    |                    |                                    |                     |
| Any                                       | 4.2 (3.6 to 4.7)    | 3.7 (3.5 to 3.9)    | 3.2 (3.2 to 3.3)                   | 0.9 (0.4 to 1.5)   | 0.5 (0.3 to 0.7)   | 1.30 (1.14 to 1.48)                | 1.15 (1.09 to 1.22) |
| Major                                     | 2.7 (2.2 to 3.1)    | 2.2 (2.1 to 2.4)    | 1.9 (1.9 to 2.0)                   | 0.8 (0.3 to 1.2)   | 0.3 (0.1 to 0.5)   | 1.40 (1.18 to 1.66)                | 1.16 (1.08 to 1.26) |
| Minor                                     | 1.6 (1.3 to 1.9)    | 1.5 (1.4 to 1.7)    | 1.4 (1.3 to 1.4)                   | 0.2 (-0.1 to 0.5)  | 0.2 (0.0 to 0.3)   | 1.17 (0.95 to 1.43)                | 1.13 (1.04 to 1.24) |
| Sex of baby (boy vs girl)                 | 50.2 (48.8 to 51.5) | 51.6 (51.0 to 52.2) | 51.4 (51.4 to 51.5)                | -1.3 (-2.7 to 0.1) | 0.2 (-0.4 to 0.7)  | 0.95 (0.90 to 1.00)                | 1.01 (0.98 to 1.03) |

Abbreviations: AAR, adjusted absolute risk; ARD, adjusted risk difference; BWGA, birth weight for gestational age; OR, odds ratio; RRR, relative risk ratio.

<sup>a</sup>Odds ratios for binary outcomes and relative risk ratios for categorical outcomes, adjusted for maternal age at delivery, birth order, delivery year, maternal country of birth, previous spontaneous abortion and previous extra-uterine pregnancy.

**eTable 3.** Pregnancy and Birth Outcomes in Double-Embryo Transfer (DET) vs Single-Embryo Transfer (SET) Pregnancies, Among Frozen Cycles Only

|                                           | AAR, % (95% CI)     |                     | Model 1                         |                                 | AAR, % (95% CI)     |                     | Model 2                         |                                 |
|-------------------------------------------|---------------------|---------------------|---------------------------------|---------------------------------|---------------------|---------------------|---------------------------------|---------------------------------|
|                                           | DET                 | SET                 | ARD, percentage points (95% CI) | RRR or OR (95% CI) <sup>a</sup> | DET                 | SET                 | ARD, percentage points (95% CI) | RRR or OR (95% CI) <sup>a</sup> |
| Gestational age (vs term)                 |                     |                     |                                 |                                 |                     |                     |                                 |                                 |
| Moderately preterm (32-36 weeks)          | 4.4 (3.1 to 5.8)    | 4.8 (4.4 to 5.2)    | -0.4 (-1.8 to 1.1)              | 0.92 (0.66 to 1.28)             | 4.3 (3.0 to 5.6)    | 4.8 (4.4 to 5.2)    | -0.5 (-1.9 to 0.9)              | 0.90 (0.64 to 1.25)             |
| Very preterm (<32 weeks)                  | 1.7 (0.8 to 2.6)    | 1.0 (0.8 to 1.2)    | 0.7 (-0.2 to 1.7)               | 1.75 (0.96 to 3.17)             | 1.7 (0.8 to 2.6)    | 1.0 (0.8 to 1.2)    | 0.7 (-0.3 to 1.6)               | 1.70 (0.93 to 3.09)             |
| Low birth weight (<2500g vs ≥2500g)       | 4.9 (3.4 to 6.4)    | 3.2 (2.9 to 3.5)    | 1.7 (0.2 to 3.2)                | 1.57 (1.12 to 2.19)             | 4.7 (3.3 to 6.2)    | 3.2 (2.9 to 3.5)    | 1.6 (0.1 to 3.0)                | 1.51 (1.08 to 2.12)             |
| BWGA percentile (vs 25.0-74.9 percentile) |                     |                     |                                 |                                 |                     |                     |                                 |                                 |
| <10.0                                     | 18.4 (15.0 to 21.8) | 15.4 (14.6 to 16.3) | 3.0 (-0.6 to 6.5)               | 1.24 (0.97 to 1.58)             | 18.3 (14.9 to 21.7) | 15.4 (14.5 to 16.3) | 2.9 (-0.6 to 6.4)               | 1.24 (0.97 to 1.58)             |
| 10.0-24.9                                 | 21.8 (18.2 to 25.3) | 22.1 (21.1 to 23.1) | -0.3 (-4.0 to 3.4)              | 0.98 (0.79 to 1.22)             | 21.8 (18.3 to 25.4) | 22.1 (21.1 to 23.1) | -0.3 (-4.0 to 3.4)              | 0.98 (0.79 to 1.22)             |
| 75.0-89.9                                 | 22.0 (18.4 to 25.5) | 23.6 (22.6 to 24.6) | -1.7 (-5.4 to 2.0)              | 0.91 (0.73 to 1.13)             | 22.0 (18.5 to 25.6) | 23.6 (22.6 to 24.6) | -1.6 (-5.2 to 2.1)              | 0.92 (0.74 to 1.14)             |
| ≥90.0                                     | 15.6 (12.5 to 18.7) | 18.6 (17.7 to 19.6) | -3.0 (-6.3 to 0.2)              | 0.81 (0.63 to 1.03)             | 15.5 (12.4 to 18.5) | 18.7 (17.7 to 19.6) | -3.2 (-6.4 to 0.0)              | 0.80 (0.62 to 1.02)             |

Analyses restricted to frozen cycles with information on endometrial preparation and years since embryo cryopreservation, n=11 576.

Abbreviations: AAR, adjusted absolute risk; ARD, adjusted risk difference; BWGA, birth weight for gestational age; OR, odds ratio; RRR, relative risk ratio

<sup>a</sup>Odds ratios for binary outcomes and relative risk ratios for categorical outcomes. Model 1 adjusted for maternal age at delivery, birth order, delivery year, maternal country of birth, previous spontaneous abortion, previous extra-uterine pregnancy and total number of stimulations. Model 2 adjusted similarly to as in Model 1, with additional adjustments for endometrial preparation (artificial, natural cycle) and years since embryo cryopreservation (<1, 1-2, 3 or more).

**eTable 4.** Pregnancy Outcomes in Double-Embryo Transfer (DET) vs Single-Embryo Transfer (SET) Pregnancies Stratified by Fresh or Frozen Cycle and by Cleavage Stage or Blastocyst Transfer

|                                           | Fresh cycles, cleavage stage, n=19 109 |                     |                                 |                                 | Frozen cycles, cleavage stage, n=5 230 |                     |                                 |                                 | P value for interaction <sup>b</sup> |
|-------------------------------------------|----------------------------------------|---------------------|---------------------------------|---------------------------------|----------------------------------------|---------------------|---------------------------------|---------------------------------|--------------------------------------|
|                                           | AAR, % (95% CI) DET                    | AAR, % (95% CI) SET | ARD, percentage points (95% CI) | RRR or OR (95% CI) <sup>a</sup> | AAR, % (95% CI) DET                    | AAR, % (95% CI) SET | ARD, percentage points (95% CI) | RRR or OR (95% CI) <sup>a</sup> |                                      |
| Gestational age (vs term)                 |                                        |                     |                                 |                                 |                                        |                     |                                 |                                 |                                      |
| Moderately preterm (32-36 weeks)          | 5.4 (4.7 to 6.2)                       | 6.2 (5.8 to 6.6)    | -0.7 (-1.7 to 0.2)              | 0.87 (0.73 to 1.04)             | 4.2 (2.7 to 5.7)                       | 4.5 (3.9 to 5.1)    | -0.3 (-1.9 to 1.3)              | 0.93 (0.62 to 1.39)             | 0.50                                 |
| Very preterm (<32 weeks)                  | 1.2 (0.8 to 1.5)                       | 1.3 (1.1 to 1.5)    | -0.2 (-0.6 to 0.3)              | 0.88 (0.61 to 1.26)             | 1.6 (0.6 to 2.6)                       | 1.1 (0.8 to 1.5)    | 0.4 (-0.6 to 1.5)               | 1.40 (0.69 to 2.81)             |                                      |
| Low birth weight (<2500g vs ≥2500g)       | 4.3 (3.7 to 5.0)                       | 5.6 (5.3 to 6.0)    | -1.3 (-2.1 to -0.5)             | 0.76 (0.63 to 0.91)             | 4.7 (3.1 to 6.3)                       | 3.7 (3.1 to 4.3)    | 1.0 (-0.7 to 2.7)               | 1.29 (0.87 to 1.91)             | 0.02                                 |
| BWGA percentile (vs 25.0-74.9 percentile) |                                        |                     |                                 |                                 |                                        |                     |                                 |                                 |                                      |
| <10.0                                     | 22.7 (20.8 to 24.5)                    | 23.1 (22.3 to 24.0) | -0.4 (-2.5 to 1.7)              | 0.97 (0.86 to 1.10)             | 19.0 (15.2 to 22.9)                    | 17.2 (15.7 to 18.7) | 1.9 (-2.2 to 6.0)               | 1.14 (0.87 to 1.50)             | 0.73                                 |
| 10.0-24.9                                 | 27.8 (25.9 to 29.7)                    | 27.3 (26.4 to 28.2) | 0.5 (-1.6 to 2.7)               | 1.03 (0.92 to 1.14)             | 21.9 (18.0 to 25.7)                    | 21.6 (20.0 to 23.1) | 0.3 (-3.8 to 4.5)               | 1.02 (0.80 to 1.30)             |                                      |
| 75.0-89.9                                 | 17.3 (15.6 to 19.0)                    | 17.6 (16.8 to 18.4) | -0.3 (-2.2 to 1.6)              | 0.98 (0.86 to 1.12)             | 19.7 (16.1 to 23.3)                    | 21.6 (20.1 to 23.2) | -1.9 (-5.8 to 1.9)              | 0.89 (0.70 to 1.13)             |                                      |
| ≥90.0                                     | 10.5 (9.1 to 11.9)                     | 11.6 (10.9 to 12.4) | -1.2 (-2.7 to 0.4)              | 0.89 (0.75 to 1.05)             | 14.2 (11.1 to 17.3)                    | 17.2 (15.8 to 18.7) | -3.0 (-6.4 to 0.4)              | 0.79 (0.60 to 1.04)             |                                      |
|                                           | Fresh cycles, blastocyst, n=4 848      |                     |                                 |                                 | Frozen cycles, blastocyst, n=6 543     |                     |                                 |                                 | P value for interaction <sup>b</sup> |
|                                           | AAR, % (95% CI) DET                    | AAR, % (95% CI) SET | ARD, percentage points (95% CI) | RRR or OR (95% CI) <sup>a</sup> | AAR, % (95% CI) DET                    | AAR, % (95% CI) SET | ARD, percentage points (95% CI) | RRR or OR (95% CI) <sup>a</sup> |                                      |
| Gestational age (vs term)                 |                                        |                     |                                 |                                 |                                        |                     |                                 |                                 |                                      |
| Moderately preterm (32-36 weeks)          | 5.2 (2.7 to 7.7)                       | 6.6 (5.9 to 7.3)    | -1.4 (-4.0 to 1.2)              | 0.78 (0.47 to 1.30)             | 7.1 (3.3 to 10.8)                      | 5.0 (4.5 to 5.6)    | 2.1 (-1.7 to 5.9)               | 1.44 (0.80 to 2.59)             | 0.21                                 |
| Very preterm (<32 weeks)                  | 3.2 (1.0 to 5.4)                       | 1.4 (1.1 to 1.8)    | 1.7 (-0.5 to 4.0)               | 2.26 (1.06 to 4.79)             | 3.6 (0.7 to 6.5)                       | 1.0 (0.7 to 1.2)    | 2.6 (-0.3 to 5.6)               | 3.83 (1.59 to 9.25)             |                                      |
| Low birth weight (<2500g vs ≥2500g)       | 7.6 (4.5 to 10.7)                      | 5.6 (4.9 to 6.3)    | 2.0 (-1.2 to 5.2)               | 1.39 (0.87 to 2.21)             | 8.4 (4.3 to 12.5)                      | 3.1 (2.6 to 3.5)    | 5.3 (1.2 to 9.5)                | 2.92 (1.67 to 5.11)             | 0.05                                 |
| BWGA percentile (vs 25.0-74.9 percentile) |                                        |                     |                                 |                                 |                                        |                     |                                 |                                 |                                      |
| <10.0                                     | 23.2 (17.1 to 29.2)                    | 21.4 (19.9 to 22.9) | 1.8 (-4.4 to 8.0)               | 1.11 (0.78 to 1.58)             | 15.6 (8.4 to 22.8)                     | 15.7 (14.5 to 16.9) | -0.1 (-7.4 to 7.3)              | 0.99 (0.57 to 1.75)             | 0.79                                 |
| 10.0-24.9                                 | 24.5 (18.3 to 30.8)                    | 26.8 (25.2 to 28.4) | -2.2 (-8.7 to 4.2)              | 0.89 (0.63 to 1.26)             | 25.9 (17.5 to 34.2)                    | 22.9 (21.6 to 24.2) | 2.9 (-5.5 to 11.4)              | 1.17 (0.75 to 1.83)             |                                      |

|           |                     |                     |                   |                     |                     |                     |                    |                     |
|-----------|---------------------|---------------------|-------------------|---------------------|---------------------|---------------------|--------------------|---------------------|
| 75.0-89.9 | 19.3 (13.7 to 24.9) | 18.3 (16.9 to 19.8) | 1.0 (-4.8 to 6.8) | 1.07 (0.73 to 1.55) | 25.3 (17.4 to 33.2) | 24.3 (23.0 to 25.6) | 1.0 (-7.0 to 9.1)  | 1.06 (0.69 to 1.62) |
| ≥90.0     | 12.8 (8.0 to 17.7)  | 12.2 (11.0 to 13.5) | 0.6 (-4.4 to 5.6) | 1.06 (0.67 to 1.66) | 16.7 (9.6 to 23.8)  | 18.7 (17.5 to 20.0) | -2.0 (-9.3 to 5.2) | 0.87 (0.51 to 1.47) |

Abbreviations: AAR, adjusted absolute risk; ARD, adjusted risk difference; BWGA, birth weight for gestational age; OR, odds ratio; RRR, relative risk ratio.

<sup>a</sup>Odds ratios for binary outcomes and relative risk ratios for categorical outcomes, adjusted for maternal age at delivery, birth order, delivery year, maternal country of birth, previous spontaneous abortion, previous extra-uterine pregnancy and total number of stimulations.

<sup>b</sup>Likelihood ratio tests for interaction between each outcome and fresh or frozen cycle with cleavage stage embryos, or fresh or frozen cycle with blastocyst embryos, respectively.

**eTable 5. Pregnancy and Birth Outcomes in Double-Embryo Transfer (DET) vs Single-Embryo Transfer (SET) pregnancies Among First Births Only**

|                                           | AAR, % (95% CI)     |                     | ARD, percentage points (95% CI) | RRR or OR (95% CI) <sup>a</sup> |
|-------------------------------------------|---------------------|---------------------|---------------------------------|---------------------------------|
|                                           | DET                 | SET                 |                                 |                                 |
| Gestational hypertension (yes vs no)      | 7.2 (6.2 to 8.1)    | 6.9 (6.5 to 7.2)    | 0.3 (-0.7 to 1.3)               | 1.04 (0.89 to 1.22)             |
| Preeclampsia (yes vs no)                  | 4.6 (3.9 to 5.4)    | 4.9 (4.6 to 5.2)    | -0.2 (-1.1 to 0.6)              | 0.95 (0.79 to 1.14)             |
| Gestational diabetes (yes vs no)          | 1.9 (1.5 to 2.4)    | 2.2 (2.0 to 2.4)    | -0.3 (-0.8 to 0.2)              | 0.87 (0.66 to 1.13)             |
| Bleeding during pregnancy (yes vs no)     | 5.3 (4.5 to 6.0)    | 5.0 (4.6 to 5.3)    | 0.3 (-0.5 to 1.1)               | 1.07 (0.90 to 1.26)             |
| Placental abruption (yes vs no)           | 0.4 (0.2 to 0.6)    | 0.6 (0.5 to 0.7)    | -0.2 (-0.5 to 0.0)              | 0.62 (0.36 to 1.09)             |
| Prelabor rupture of membranes (yes vs no) | 2.6 (2.0 to 3.2)    | 2.8 (2.6 to 3.1)    | -0.2 (-0.9 to 0.4)              | 0.91 (0.71 to 1.17)             |
| Mode of delivery (vs unassisted vaginal)  |                     |                     |                                 |                                 |
| Instrumental vaginal                      | 17.5 (15.9 to 19.1) | 16.8 (16.1 to 17.4) | 0.8 (-1.0 to 2.5)               | 1.06 (0.93 to 1.20)             |
| Planned cesarean                          | 13.6 (12.2 to 15.0) | 12.5 (11.9 to 13.0) | 1.1 (-0.5 to 2.6)               | 1.10 (0.96 to 1.27)             |
| Emergency cesarean                        | 23.5 (21.8 to 25.2) | 22.9 (22.2 to 23.6) | 0.6 (-1.3 to 2.5)               | 1.04 (0.93 to 1.15)             |
| Induced delivery (yes vs no)              | 21.0 (19.5 to 22.5) | 21.0 (20.4 to 21.6) | 0.0 (-1.6 to 1.6)               | 1.00 (0.91 to 1.10)             |
| Infant death within 0-27 days (yes vs no) | 0.4 (0.1 to 0.8)    | 0.1 (0.1 to 0.1)    | 0.3 (0.0 to 0.7)                | 4.53 (1.80 to 11.35)            |
| Gestational age (vs term)                 |                     |                     |                                 |                                 |
| Moderately preterm (32-36 weeks)          | 5.5 (4.7 to 6.4)    | 6.2 (5.9 to 6.6)    | -0.7 (-1.7 to 0.2)              | 0.88 (0.74 to 1.05)             |
| Very preterm (<32 weeks)                  | 1.4 (1.0 to 1.9)    | 1.5 (1.3 to 1.7)    | -0.1 (-0.6 to 0.4)              | 0.94 (0.67 to 1.31)             |
| Birth weight (<2500g vs ≥2500g)           | 5.4 (4.6 to 6.2)    | 5.7 (5.4 to 6.1)    | -0.4 (-1.3 to 0.5)              | 0.93 (0.78 to 1.11)             |
| BWGA percentile (vs 25.0-74.9 percentile) |                     |                     |                                 |                                 |
| <10.0                                     | 26.2 (24.2 to 28.3) | 24.0 (23.2 to 24.7) | 2.3 (0.0 to 4.5)                | 1.13 (1.00 to 1.27)             |
| 10.0-24.9                                 | 30.3 (28.2 to 32.4) | 27.7 (26.9 to 28.4) | 2.7 (0.4 to 5.0)                | 1.14 (1.02 to 1.27)             |
| 75.0-89.9                                 | 16.4 (14.6 to 18.2) | 17.3 (16.6 to 18.0) | -0.9 (-2.9 to 1.0)              | 0.94 (0.81 to 1.08)             |
| ≥90.0                                     | 10.5 (9.0 to 12.1)  | 11.1 (10.5 to 11.7) | -0.6 (-2.3 to 1.1)              | 0.94 (0.79 to 1.12)             |
| Apgar score (<7 vs ≥7)                    | 1.9 (1.4 to 2.4)    | 1.8 (1.6 to 1.9)    | 0.2 (-0.4 to 0.7)               | 1.09 (0.80 to 1.48)             |
| Congenital malformation (vs none)         |                     |                     |                                 |                                 |
| Any                                       | 5.1 (4.2 to 5.9)    | 4.3 (4.0 to 4.6)    | 0.8 (-0.1 to 1.7)               | 1.20 (0.99 to 1.45)             |
| Major                                     | 3.0 (2.4 to 3.7)    | 2.4 (2.2 to 2.6)    | 0.6 (-0.1 to 1.3)               | 1.26 (0.98 to 1.61)             |
| Minor                                     | 2.2 (1.6 to 2.7)    | 2.0 (1.8 to 2.1)    | 0.2 (-0.4 to 0.8)               | 1.12 (0.84 to 1.49)             |
| Sex of baby (boy vs girl)                 | 49.7 (47.8 to 51.5) | 52.0 (51.3 to 52.7) | -2.4 (-4.4 to -0.4)             | 0.91 (0.84 to 0.99)             |

Abbreviations: AAR, adjusted absolute risk; ARD, adjusted risk difference; BWGA, birth weight for gestational age; OR, odds ratio; RRR, relative risk ratio.

<sup>a</sup>Odds ratios for binary outcomes and relative risk ratios for categorical outcomes, adjusted for maternal age at delivery, delivery year, maternal country of birth, previous spontaneous abortion, previous extra-uterine pregnancy and total number of stimulations.

**eTable 6. Sensitivity Analysis of Table 2, Including Adjustments by Means of Multiple Imputation**

|                                           | Model 1             |                     |                                 |                                 | Model 2             |                     |                                 |                                 |
|-------------------------------------------|---------------------|---------------------|---------------------------------|---------------------------------|---------------------|---------------------|---------------------------------|---------------------------------|
|                                           | AAR, % (95% CI)     |                     | ARD, percentage points (95% CI) | RRR or OR (95% CI) <sup>a</sup> | AAR, % (95% CI)     |                     | ARD, percentage points (95% CI) | RRR or OR (95% CI) <sup>a</sup> |
|                                           | DET                 | SET                 |                                 |                                 | DET                 | SET                 |                                 |                                 |
| Gestational hypertension (yes vs no)      | 5.9 (5.2 to 6.6)    | 5.8 (5.5 to 6.1)    | 0.10 (-0.65 to 0.85)            | 1.02 (0.89 to 1.17)             | 5.8 (5.2 to 6.5)    | 5.8 (5.5 to 6.1)    | 0.02 (-0.72 to 0.75)            | 1.00 (0.87 to 1.15)             |
| Preeclampsia (yes vs no)                  | 3.8 (3.3 to 4.4)    | 3.9 (3.7 to 4.2)    | -0.13 (-0.73 to 0.48)           | 0.97 (0.82 to 1.14)             | 3.8 (3.2 to 4.3)    | 3.9 (3.7 to 4.2)    | -0.18 (-0.78 to 0.42)           | 0.95 (0.81 to 1.12)             |
| Gestational diabetes (yes vs no)          | 1.9 (1.5 to 2.3)    | 2.1 (2.0 to 2.3)    | -0.22 (-0.64 to 0.20)           | 0.90 (0.72 to 1.12)             | 1.9 (1.5 to 2.2)    | 2.2 (2.0 to 2.3)    | -0.28 (-0.69 to 0.13)           | 0.87 (0.69 to 1.08)             |
| Bleeding during pregnancy (yes vs no)     | 5.0 (4.4 to 5.6)    | 4.7 (4.5 to 4.9)    | 0.34 (-0.32 to 1.01)            | 1.08 (0.94 to 1.24)             | 5.0 (4.4 to 5.6)    | 4.7 (4.5 to 4.9)    | 0.33 (-0.34 to 0.99)            | 1.07 (0.93 to 1.24)             |
| Placental abruption (yes vs no)           | 0.6 (0.4 to 0.8)    | 0.6 (0.5 to 0.7)    | 0.01 (-0.24 to 0.25)            | 1.01 (0.67 to 1.52)             | 0.6 (0.4 to 0.8)    | 0.6 (0.5 to 0.7)    | 0.00 (-0.24 to 0.25)            | 1.01 (0.67 to 1.52)             |
| Prelabor rupture of membranes (yes vs no) | 2.5 (2.0 to 2.9)    | 2.5 (2.3 to 2.7)    | -0.02 (-0.52 to 0.48)           | 0.99 (0.80 to 1.22)             | 2.4 (2.0 to 2.9)    | 2.5 (2.3 to 2.7)    | -0.03 (-0.53 to 0.46)           | 0.99 (0.80 to 1.21)             |
| Mode of delivery (vs unassisted vaginal)  |                     |                     |                                 |                                 |                     |                     |                                 |                                 |
| Instrumental vaginal                      | 12.9 (11.8 to 14.1) | 12.3 (11.8 to 12.7) | 0.67 (-0.56 to 1.91)            | 1.07 (0.95 to 1.20)             | 12.9 (11.8 to 14.1) | 12.3 (11.8 to 12.7) | 0.68 (-0.56 to 1.91)            | 1.07 (0.95 to 1.20)             |
| Planned cesarean                          | 15.1 (13.9 to 16.2) | 14.1 (13.7 to 14.6) | 0.94 (-0.32 to 2.20)            | 1.08 (0.98 to 1.20)             | 15.0 (13.8 to 16.1) | 14.1 (13.7 to 14.6) | 0.86 (-0.40 to 2.11)            | 1.07 (0.97 to 1.19)             |
| Emergency cesarean                        | 19.5 (18.2 to 20.8) | 18.6 (18.1 to 19.1) | 0.86 (-0.53 to 2.25)            | 1.06 (0.97 to 1.16)             | 19.3 (18.1 to 20.6) | 18.7 (18.2 to 19.1) | 0.66 (-0.72 to 2.03)            | 1.05 (0.95 to 1.15)             |
| Induced delivery (yes vs no)              | 19.5 (18.3 to 20.6) | 19.1 (18.6 to 19.5) | 0.41 (-0.85 to 1.68)            | 1.03 (0.95 to 1.11)             | 19.3 (18.2 to 20.4) | 19.1 (18.6 to 19.5) | 0.23 (-1.02 to 1.48)            | 1.02 (0.94 to 1.10)             |
| Infant death within 0-27 days (yes vs no) | 0.3 (0.1 to 0.5)    | 0.1 (0.1 to 0.1)    | 0.19 (-0.01 to 0.38)            | 2.69 (1.29 to 5.63)             | 0.3 (0.1 to 0.5)    | 0.1 (0.1 to 0.1)    | 0.18 (-0.01 to 0.37)            | 2.64 (1.26 to 5.52)             |
| Gestational age (vs term)                 |                     |                     |                                 |                                 |                     |                     |                                 |                                 |
| Moderately preterm (32-36 weeks)          | 5.3 (4.6 to 5.9)    | 5.8 (5.5 to 6.0)    | -0.53 (-1.26 to 0.20)           | 0.90 (0.78 to 1.04)             | 5.2 (4.6 to 5.9)    | 5.8 (5.5 to 6.1)    | -0.55 (-1.28 to 0.17)           | 0.90 (0.78 to 1.04)             |
| Very preterm (<32 weeks)                  | 1.4 (1.1 to 1.8)    | 1.2 (1.1 to 1.4)    | 0.20 (-0.19 to 0.60)            | 1.17 (0.88 to 1.55)             | 1.4 (1.1 to 1.8)    | 1.2 (1.1 to 1.4)    | 0.19 (-0.20 to 0.59)            | 1.16 (0.87 to 1.54)             |
| Birth weight (<2500g vs ≥2500g)           | 4.8 (4.1 to 5.4)    | 4.8 (4.6 to 5.1)    | -0.06 (-0.75 to 0.63)           | 0.99 (0.85 to 1.15)             | 4.7 (4.1 to 5.4)    | 4.8 (4.6 to 5.1)    | -0.08 (-0.76 to 0.61)           | 0.98 (0.84 to 1.15)             |
| BWGA percentile (vs 25.0-74.9 percentile) |                     |                     |                                 |                                 |                     |                     |                                 |                                 |
| <10.0                                     | 21.9 (20.3 to 23.4) | 20.7 (20.1 to 21.2) | 1.24 (-0.45 to 2.93)            | 1.08 (0.97 to 1.19)             | 21.9 (20.4 to 23.5) | 20.6 (20.1 to 21.2) | 1.28 (-0.41 to 2.97)            | 1.08 (0.98 to 1.20)             |



|                                   |                     |                     |                        |                     |                     |                     |                        |                     |
|-----------------------------------|---------------------|---------------------|------------------------|---------------------|---------------------|---------------------|------------------------|---------------------|
| 10.0-24.9                         | 26.8 (25.2 to 28.4) | 25.5 (24.9 to 26.1) | 1.28 (-0.48 to 3.04)   | 1.07 (0.98 to 1.17) | 26.9 (25.3 to 28.5) | 25.5 (24.9 to 26.1) | 1.37 (-0.39 to 3.13)   | 1.07 (0.98 to 1.18) |
| 75.0-89.9                         | 18.3 (16.8 to 19.7) | 19.8 (19.3 to 20.4) | -1.55 (-3.14 to 0.04)  | 0.90 (0.81 to 1.00) | 18.2 (16.7 to 19.6) | 19.9 (19.3 to 20.4) | -1.69 (-3.27 to -0.11) | 0.89 (0.80 to 1.00) |
| ≥90.0                             | 11.8 (10.5 to 13.0) | 14.2 (13.7 to 14.7) | -2.44 (-3.80 to -1.09) | 0.80 (0.71 to 0.91) | 11.6 (10.4 to 12.8) | 14.2 (13.7 to 14.7) | -2.61 (-3.95 to -1.28) | 0.79 (0.69 to 0.90) |
| Apgar score (<7 vs ≥7)            | 1.6 (1.2 to 1.9)    | 1.6 (1.4 to 1.7)    | 0.01 (-0.40 to 0.42)   | 1.01 (0.77 to 1.31) | 1.6 (1.2 to 1.9)    | 1.6 (1.4 to 1.7)    | -0.00 (-0.41 to 0.40)  | 1.00 (0.76 to 1.30) |
| Congenital malformation (vs none) |                     |                     |                        |                     |                     |                     |                        |                     |
| Any                               | 4.5 (3.9 to 5.1)    | 4.0 (3.8 to 4.2)    | 0.46 (-0.21 to 1.12)   | 1.12 (0.96 to 1.31) | 4.5 (3.9 to 5.1)    | 4.0 (3.8 to 4.2)    | 0.46 (-0.21 to 1.12)   | 1.12 (0.96 to 1.31) |
| Major                             | 2.8 (2.3 to 3.2)    | 2.3 (2.1 to 2.5)    | 0.45 (-0.09 to 0.98)   | 1.20 (0.98 to 1.47) | 2.8 (2.3 to 3.2)    | 2.3 (2.1 to 2.5)    | 0.44 (-0.09 to 0.97)   | 1.20 (0.98 to 1.47) |
| Minor                             | 1.8 (1.4 to 2.2)    | 1.8 (1.6 to 1.9)    | 0.02 (-0.41 to 0.46)   | 1.01 (0.79 to 1.30) | 1.8 (1.4 to 2.2)    | 1.8 (1.6 to 1.9)    | 0.03 (-0.41 to 0.46)   | 1.02 (0.79 to 1.30) |
| Sex of baby (boy vs girl)         | 49.9 (48.4 to 51.4) | 51.6 (51.1 to 52.2) | -1.74 (-3.36 to -0.12) | 0.93 (0.87 to 1.00) | 49.9 (48.4 to 51.4) | 51.7 (51.1 to 52.2) | -1.75 (-3.37 to -0.13) | 0.93 (0.87 to 0.99) |

Abbreviations: AAR, adjusted absolute risk; ARD, adjusted risk difference; BWGA, birth weight for gestational age; OR, odds ratio; RRR, relative risk ratio.

<sup>a</sup>Relative risk denotes odds ratios for binary outcomes and relative risk ratios for categorical outcomes. Model 1 adjusted for maternal age at delivery, birth order, delivery year, maternal country of birth, previous spontaneous abortion, previous extra-uterine pregnancy, total number of stimulations and fertilization method. Model 2 adjusted similarly to as in Model 1, with additional adjustments for maternal education, body-mass index (BMI) and smoking during pregnancy.

Multivariate imputation by chained equations (MICE) were used for handling missing values of for fertilization method, maternal education, BMI, smoking in 7% incomplete cases. Smoking was imputed using logistic regression and multinomial logistic regression was used for imputing each of the other covariates. All covariates were assumed to be missing at random given the predictors in the imputation models; maternal age, year of delivery, birth order, country of birth, previous spontaneous abortion or extra-uterine pregnancy, total number of stimulation cycles, gestational hypertension or preeclampsia, placental abruption, pre-labor rupture of membranes, pregnancy length, mode of delivery, pregnancy bleeding, malformations (none, major, minor), sex of child, as well as the other imputed variables. Ten cycles of chained equations were used. The same imputed datasets were used for all outcomes, and results from 50 imputation cycles were combined by Rubin's rules. Adjusted absolute risks and absolute risk differences predicted using the postestimation command `mimrgns` in Stata 17.0/BE.
